# Supplementary material for: Selective Inhibition of Histone Deacetylases 1/2/6 in Combination with Gemcitabine: A Promising Combination for Pancreatic Cancer Therapy
Source: PubMed Central journal article supplement (PMC6770665; doi:10.3390/cancers11091327), 2019-09-07

**Supplemental Material S1. Densitometry analysis of Western blots (band intensity normalized to loading control)**

**Fig. 1A**

| DRUG              |     | Panobinostat |     |      | Droxinostat |     |     | Mocetinostat |     |      | LMK-235 |     |      |
|-------------------|-----|--------------|-----|------|-------------|-----|-----|--------------|-----|------|---------|-----|------|
| Time (h)          | 0   | 4            | 8   | 24   | 4           | 24  | 0   | 4            | 8   | 24   | 4       | 8   | 24   |
| Cleaved PARP      | 1.0 | 1.1          | 2.1 | 12.5 | 1.2         | 2.5 | 1.0 | 0.9          | 0.7 | 10.4 | 1.0     | 0.2 | 20.6 |
| Cleaved Caspase 7 | 1.0 | 1.0          | 0.9 | 10.6 | 1.2         | 1.2 | 1.0 | 1.4          | 1.3 | 13.0 | 1.0     | 1.3 | 27.9 |

**Fig. 1C**

| Time (h)     | Control | LMK-235 | Mocetinostat | Gemcitabine | Moce + LMK | Moce + LMK + Gem |
|--------------|---------|---------|--------------|-------------|------------|------------------|
| Cleaved PARP | 1.0     | 3.0     | 0.8          | 1.5         | 6.2        | 11.3             |

**Fig. 2A**

|       | MiaPaCa-2 | Capan-1 | BxPc-3 | Panc-1 | CFPAC |
|-------|-----------|---------|--------|--------|-------|
| HDAC1 | 1.0       | 1.0     | 1.8    | 0.9    | 0.9   |
| HDAC2 | 1.0       | 0.8     | 1.3    | 0.7    | 0.8   |
| HDAC3 | 1.0       | 1.1     | 1.3    | 0.5    | 0.6   |
| HDAC4 | 1.0       | 0.5     | 1.8    | 2.2    | 2.0   |
| HDAC5 | 1.0       | 1.1     | 2.1    | 1.4    | 0.7   |
| HDAC6 | 1.0       | 1.0     | 1.5    | 1.0    | 0.7   |

**Fig. 2B**

| MiaPaCa-2 |               |       |       |       |       |       |       |
|-----------|---------------|-------|-------|-------|-------|-------|-------|
| siRNA     | Non-Targeting | HDAC1 | HDAC2 | HDAC3 | HDAC4 | HDAC5 | HDAC6 |
| HDAC1     | 1.0           | 0.2   | 1.4   | 1.3   | 1.4   | 1.4   | 1.4   |
| HDAC2     | 1.0           | 1.2   | 0.3   | 1.0   | 1.0   | 1.0   | 1.0   |
| HDAC3     | 1.0           | 1.2   | 1.0   | 0.2   | 1.5   | 1.1   | 0.9   |
| HDAC4     | 1.0           | 1.4   | 1.0   | 1.3   | 0.3   | 1.7   | 1.3   |
| HDAC5     | 1.0           | 1.1   | 1.2   | 1.1   | 1.1   | 0.4   | 1.1   |
| HDAC6     | 1.0           | 1.1   | 1.0   | 1.4   | 1.4   | 1.3   | 0.5   |

| Capan-1 |               |       |       |       |       |       |       |
|---------|---------------|-------|-------|-------|-------|-------|-------|
| siRNA   | Non-Targeting | HDAC1 | HDAC2 | HDAC3 | HDAC4 | HDAC5 | HDAC6 |
| HDAC1   | 1.0           | 0.1   | 2.0   | 2.0   | 1.7   | 1.6   | 1.3   |
| HDAC2   | 1.0           | 1.9   | 0.2   | 1.5   | 1.4   | 1.2   | 1.4   |
| HDAC3   | 1.0           | 1.1   | 1.2   | 0.2   | 1.2   | 1.0   | 1.1   |
| HDAC4   | 1.0           | 0.9   | 0.9   | 1.3   | 0.3   | 1.3   | 0.9   |
| HDAC5   | 1.0           | 1.1   | 1.1   | 1.3   | 1.2   | 0.1   | 1.0   |
| HDAC6   | 1.0           | 1.2   | 1.0   | 1.1   | 1.1   | 1.0   | 0.1   |

**Fig. 2C**

| MiaPaCa-2 |               |       |       |       |         |           |
|-----------|---------------|-------|-------|-------|---------|-----------|
| siRNA     | Non-Targeting | HDAC1 | HDAC2 | HDAC3 | HDAC1/2 | HDAC1/2/3 |
| HDAC1     | 1.0           | 0.05  | 0.9   | 0.8   | 0.1     | 0.1       |
| HDAC2     | 1.0           | 1.1   | 0.1   | 1.0   | 0.33    | 0.27      |
| HDAC3     | 1.0           | 1.2   | 1.2   | 0.2   | 1.4     | 0.2       |

| Capan-1 |               |       |           |
|---------|---------------|-------|-----------|
| siRNA   | Non-Targeting | HDAC6 | HDAC4/5/6 |
| HDAC4   | 1.0           | 0.8   | 0.1       |
| HDAC5   | 1.0           | 0.8   | 0.2       |
| HDAC6   | 1.0           | 0.1   | 0.2       |

| Capan-1 |               |         |           |
|---------|---------------|---------|-----------|
| siRNA   | Non-Targeting | HDAC1/2 | HDAC1/2/6 |
| HDAC1   | 1.0           | 0.1     | 0.2       |
| HDAC2   | 1.0           | 0.2     | 0.2       |
| HDAC6   | 1.0           | 1.1     | 0.1       |

**Fig. 4Bi**

| Capan-1               |     |      |      |      |      |
|-----------------------|-----|------|------|------|------|
| ACY-1215 ( $\mu$ M)   | 0   | 0.5  | 1.0  | 5.0  | 10   |
| ac- $\alpha$ -Tubulin | 1.0 | 29.0 | 42.3 | 43.7 | 43.9 |
| ac- Histone 3         | 0.0 | 0.0  | 0.0  | 0.5  | 1.0  |

| MiaPaCa-2             |     |      |      |      |      |
|-----------------------|-----|------|------|------|------|
| ACY-1215 ( $\mu$ M)   | 0   | 0.5  | 1.0  | 5.0  | 10   |
| ac- $\alpha$ -Tubulin | 1   | 10.4 | 25.2 | 26.0 | 24.3 |
| ac- Histone 3         | 0.0 | 0.0  | 0.3  | 0.7  | 1.0  |

**Fig. 5Ai**

| Capan-1           |         |     |           |                 |
|-------------------|---------|-----|-----------|-----------------|
|                   | Control | Gem | Rom + ACY | Rom + ACY + Gem |
| Cleaved PARP      | 1.0     | 2.0 | 4.5       | 8.1             |
| Cleaved Caspase 7 | 1.0     | 9.3 | 49.0      | 166.0           |

| MiaPaca-2         |         |     |           |                 |
|-------------------|---------|-----|-----------|-----------------|
|                   | Control | Gem | Rom + ACY | Rom + ACY + Gem |
| Cleaved PARP      | 1.0     | 2.0 | 15.0      | 27.1            |
| Cleaved Caspase 7 | 1.0     | 2.5 | 48.7      | 88.0            |

# Supplemental Material S2. Scans of Western blot films indicating the sizes of proteins covered

**Fig. 1A**

PARP

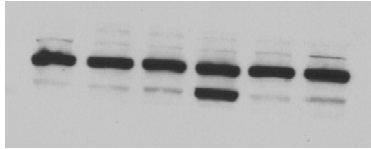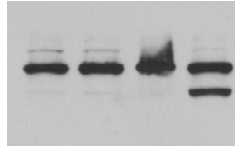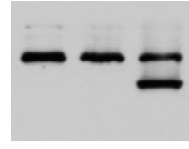

Blot was cut between 52 kDa and 72 kDa and between the 140 kDa and 260 kDa markers

Caspase 7

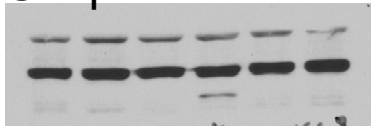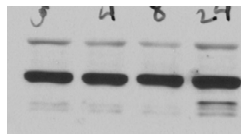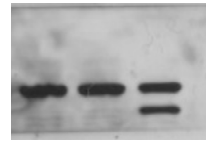

Blot was cut between 52 kDa and 42 kDa and at the 26 kDa marker

GAPDH

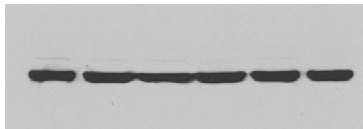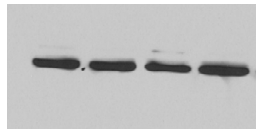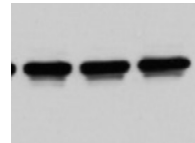

Blot was cut between 52 kDa and 42 kDa and between 35 kDa and 26 kDa markers

**Fig. 1C**

PARP

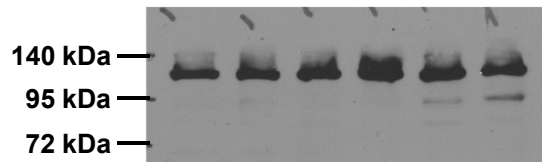

Blot was cut between 52 kDa and 72 kDa and between the 140 kDa and 260 kDa marker

GAPDH

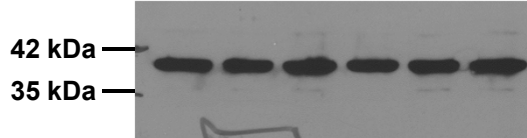

Blot was cut between 52 kDa and 42 kDa and between 35 kDa and 26 kDa markers

**Fig. 2A**

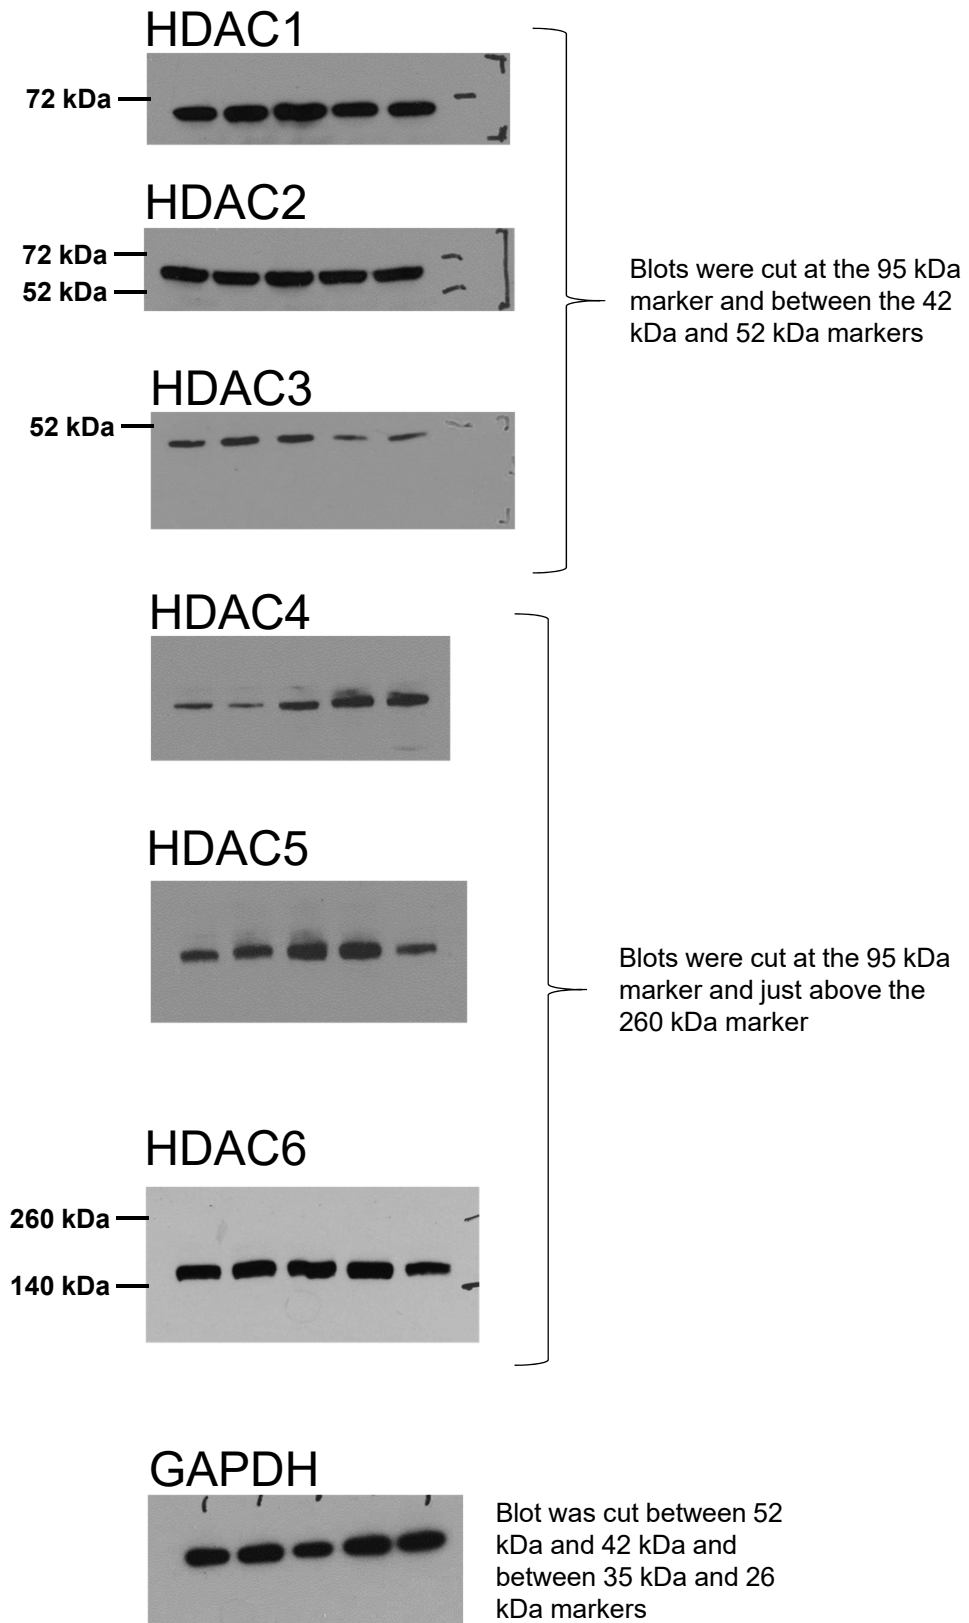

**Fig. 2Bi**

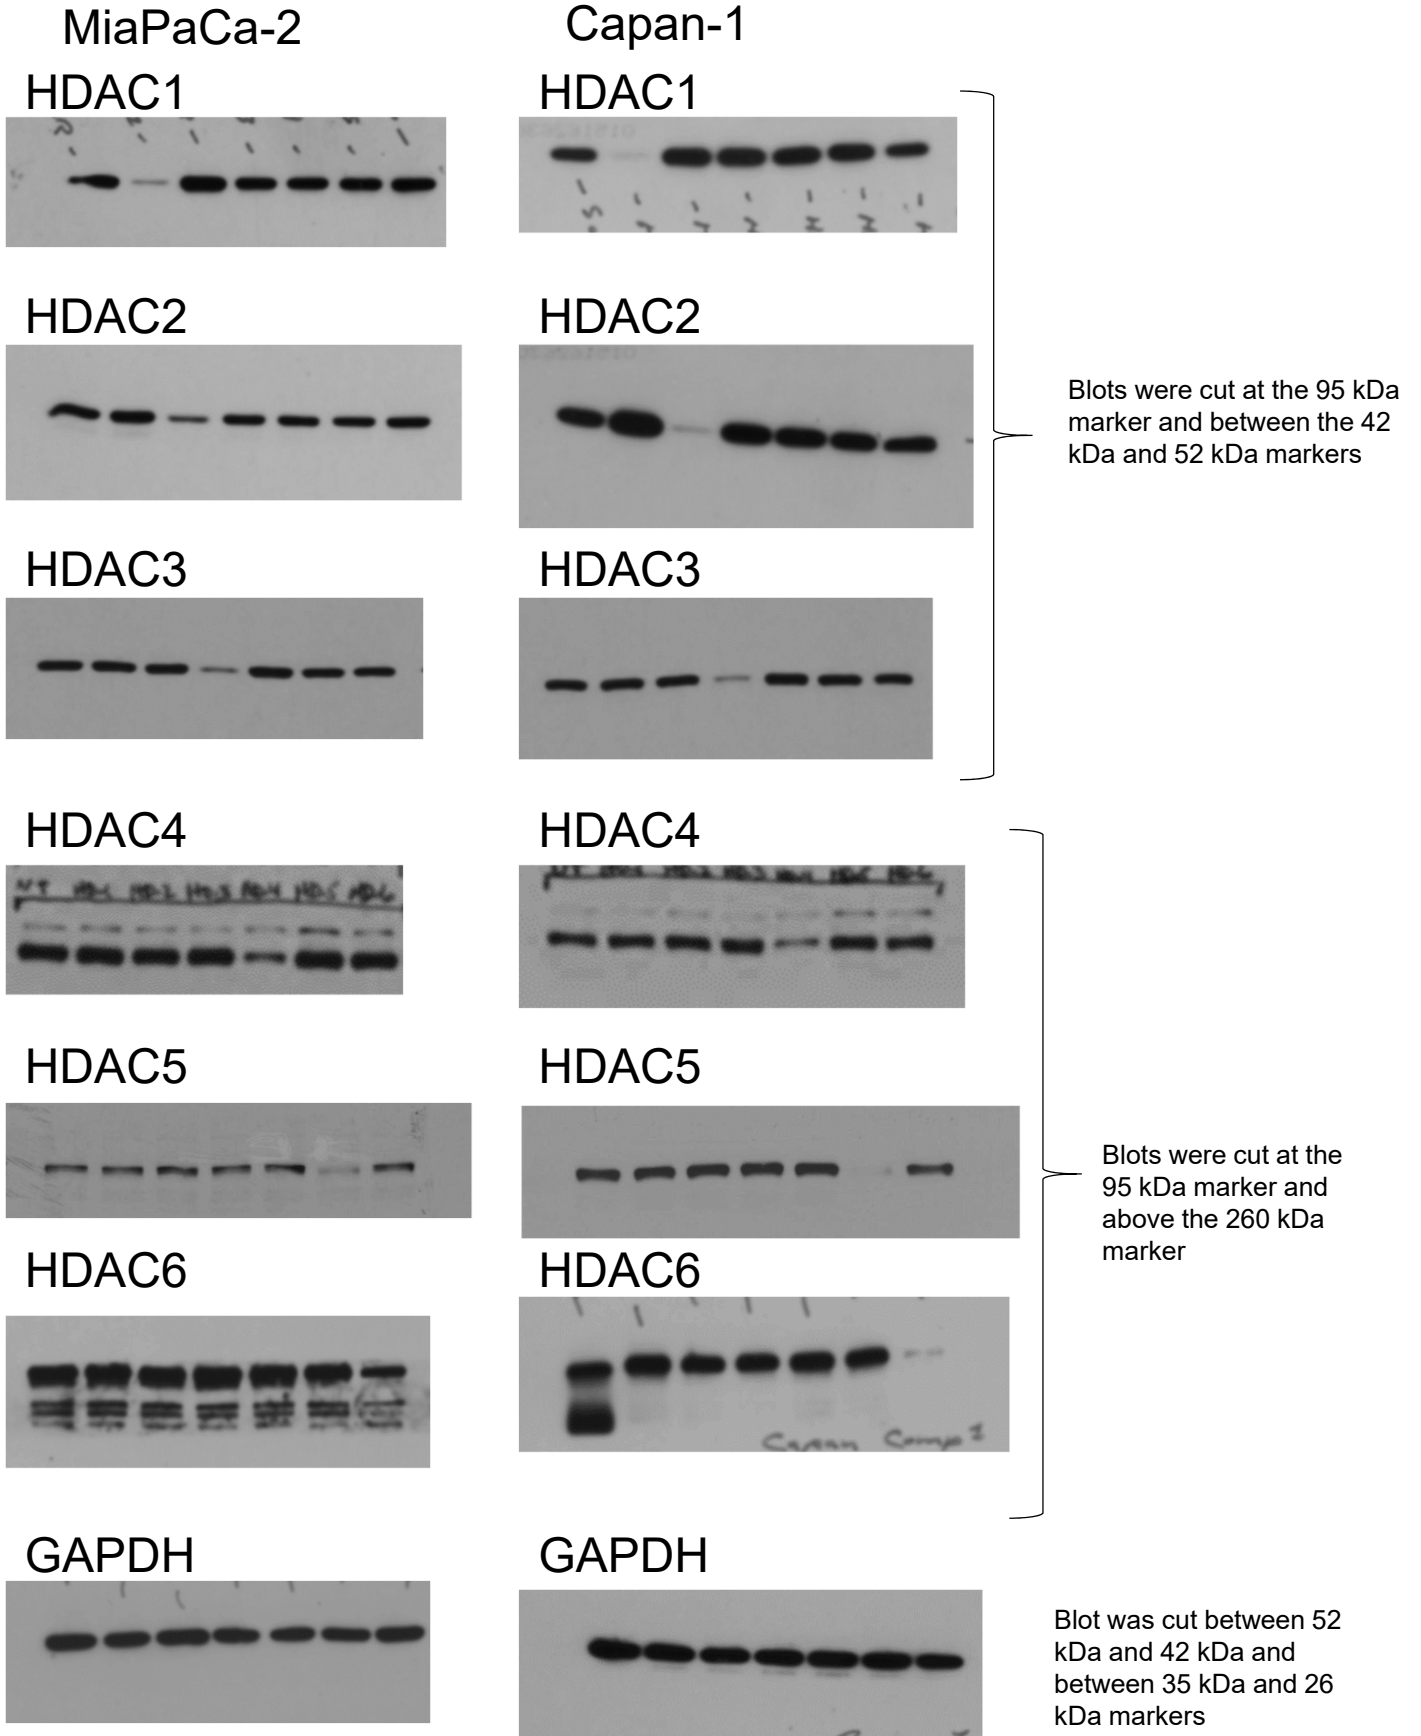

**Fig. 2Bii**

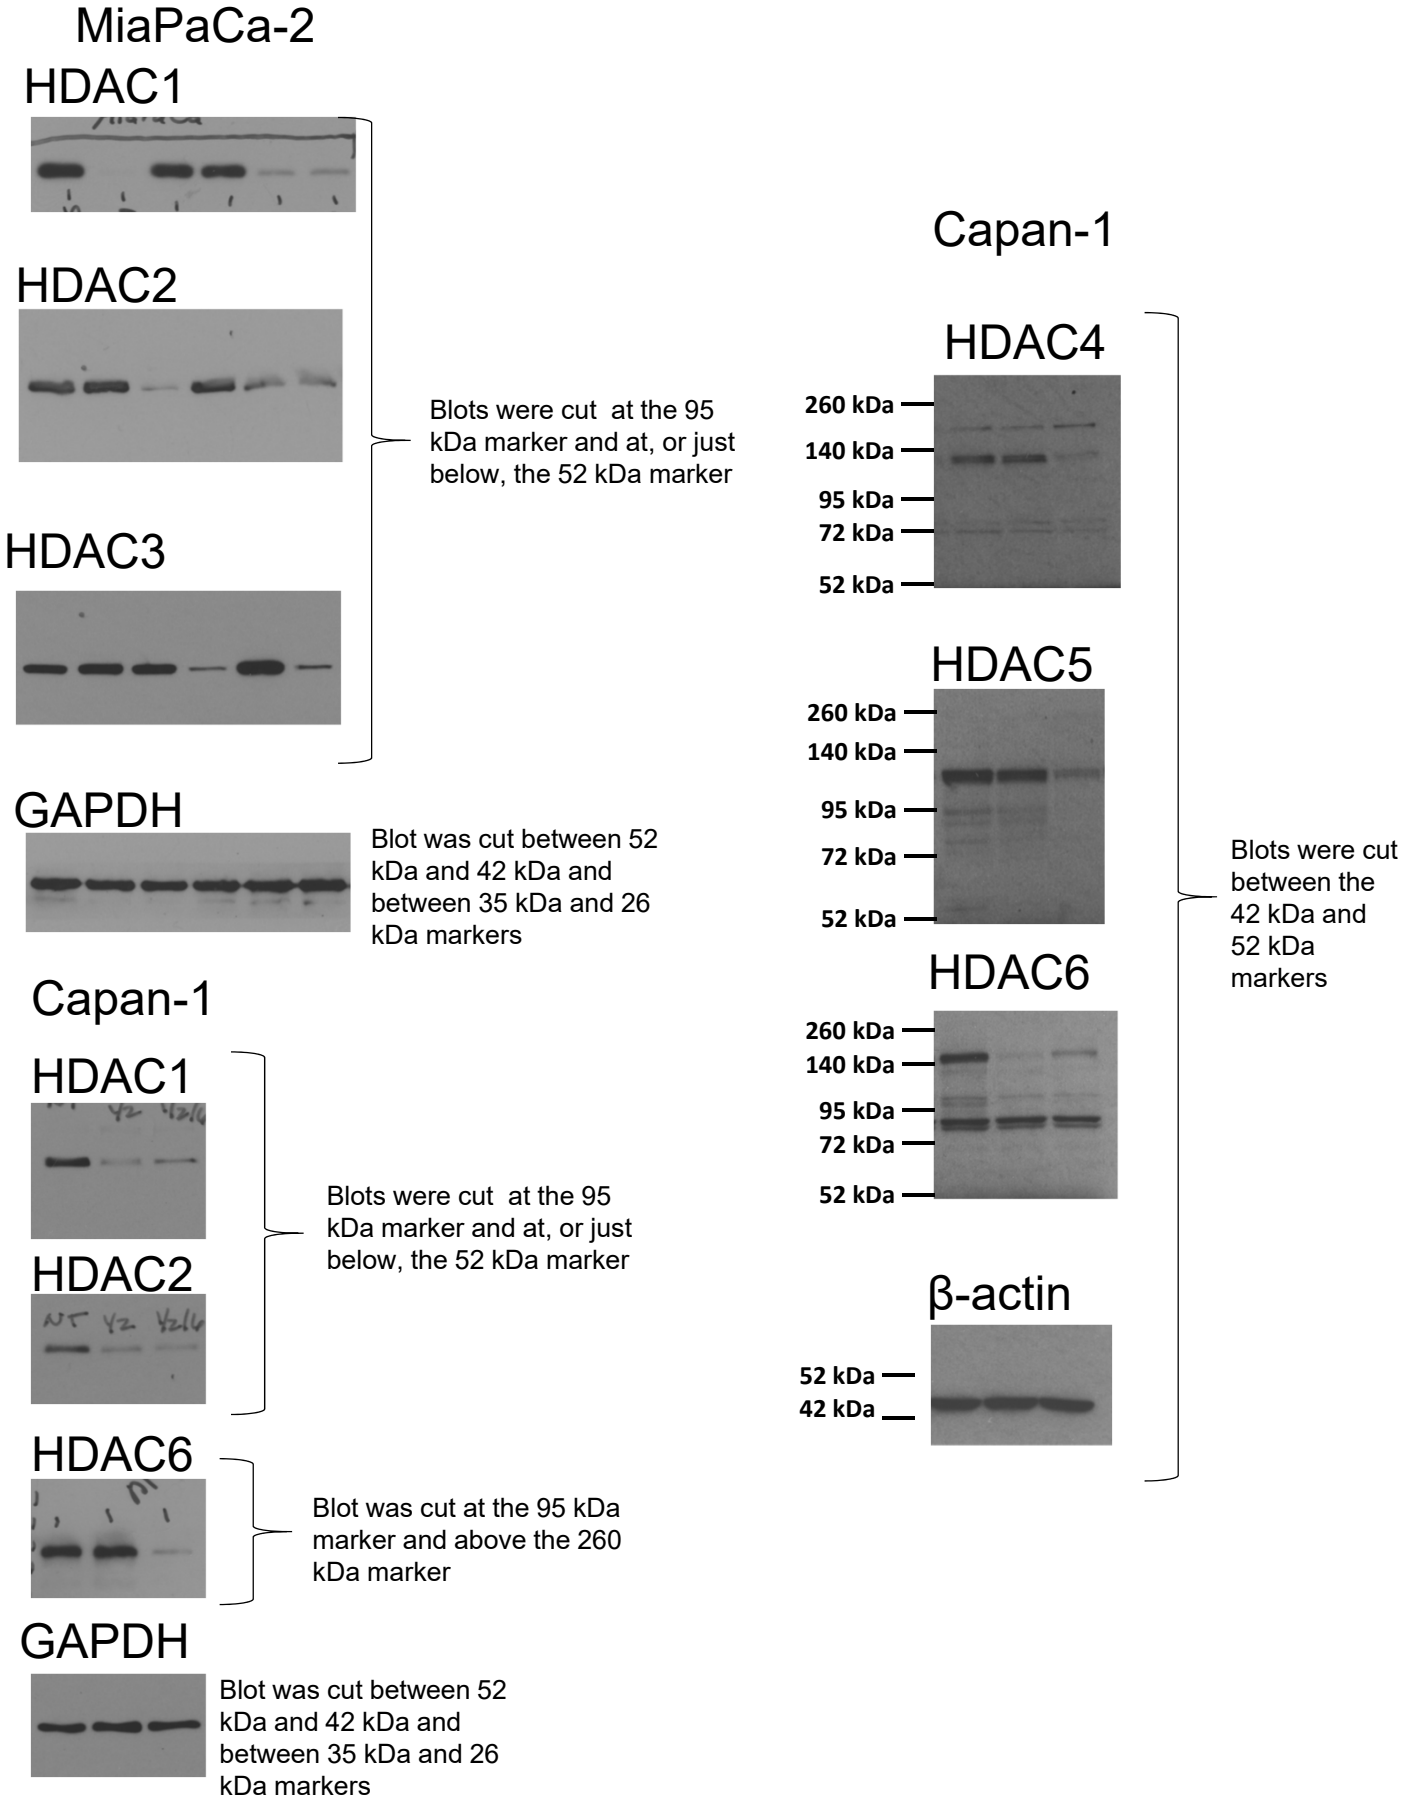

**Fig. 4B**

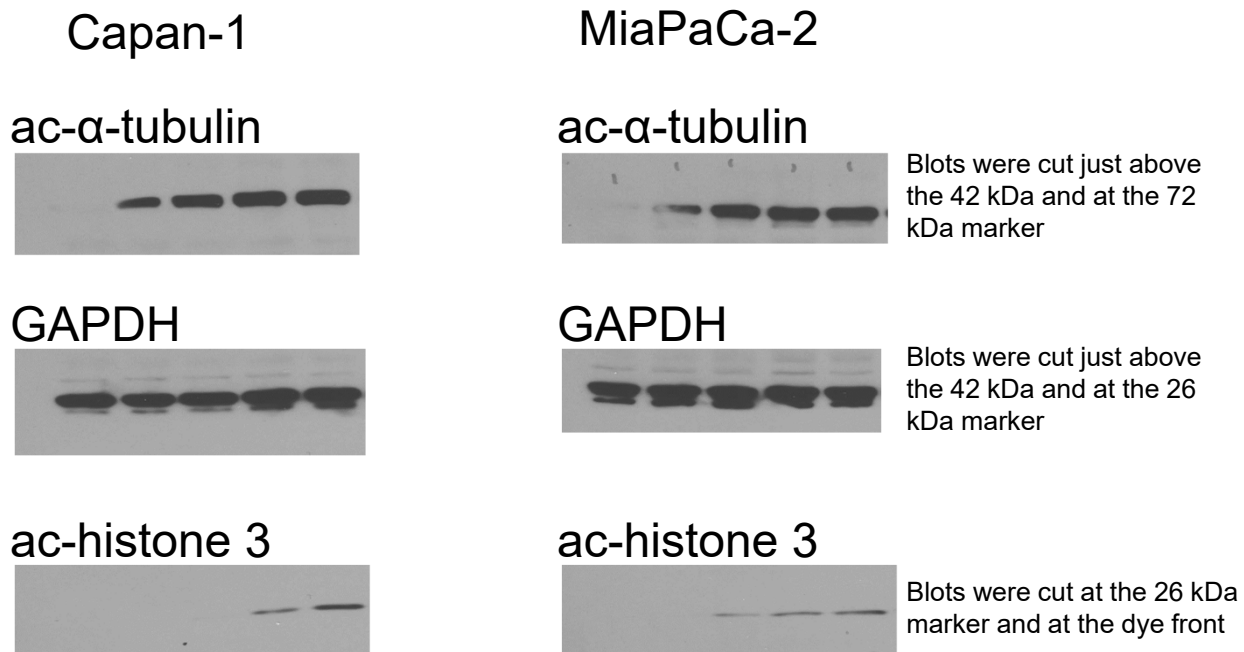



**Fig. 5A**

**Capan-1**

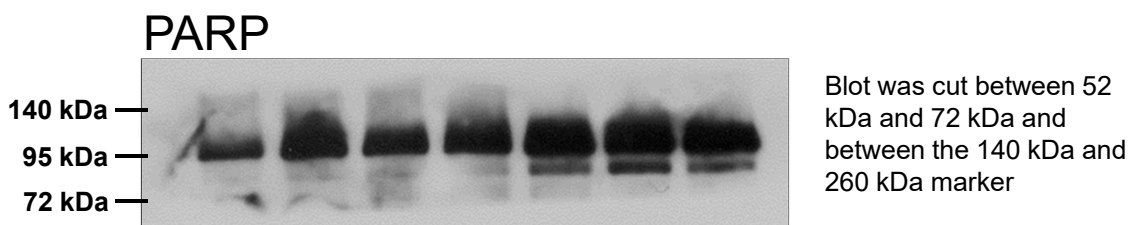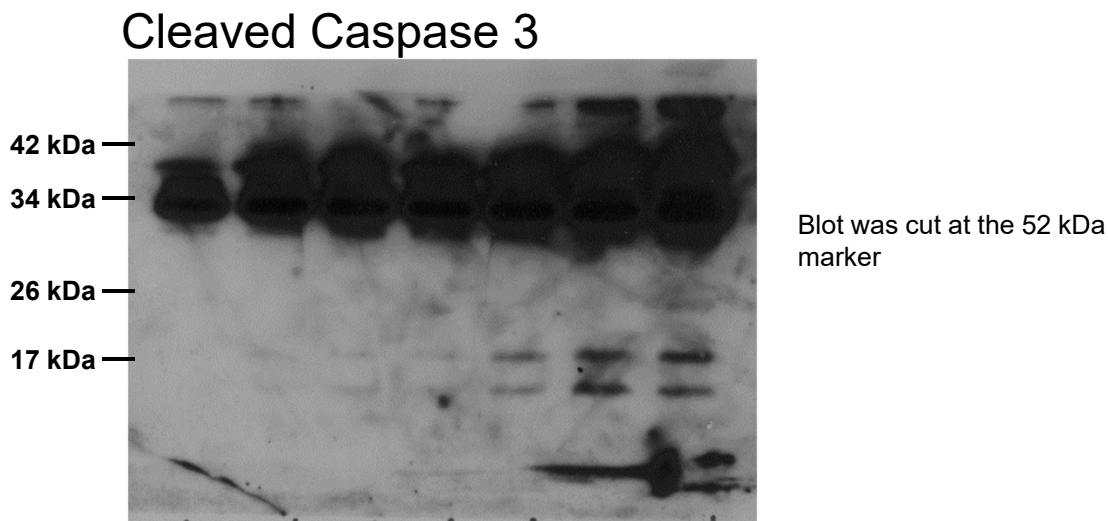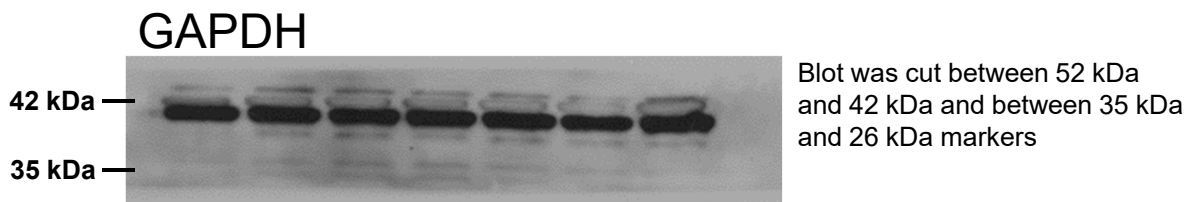

**MiaPaCa-2**

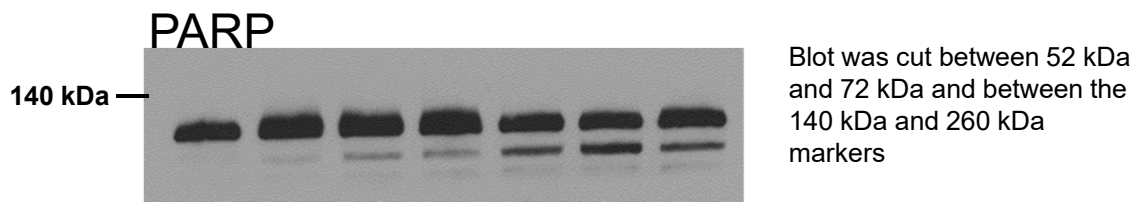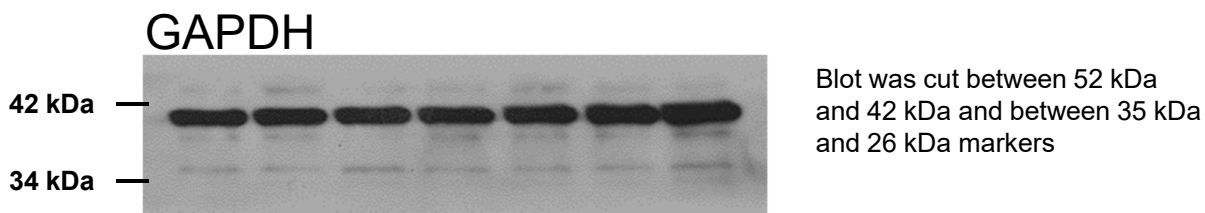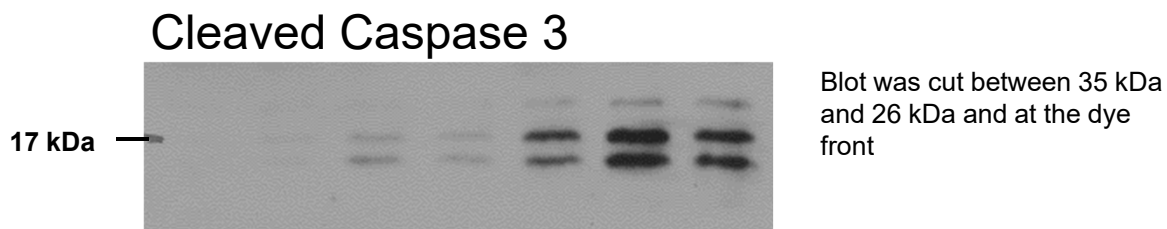

Supplement: cancers-11-01327-s001.pdf [file cancers-11-01327-s001.pdf]
